# Supplementary material
Source: Springer Nature journal article supplement (https://www.springermedizin.de/resource/supplementary/12958_2005_293_MOESM5_ESM.pdf/9567562)

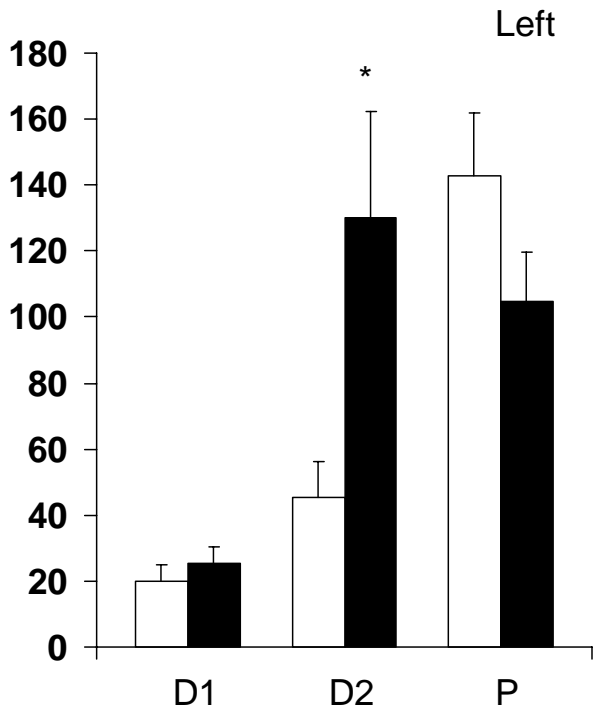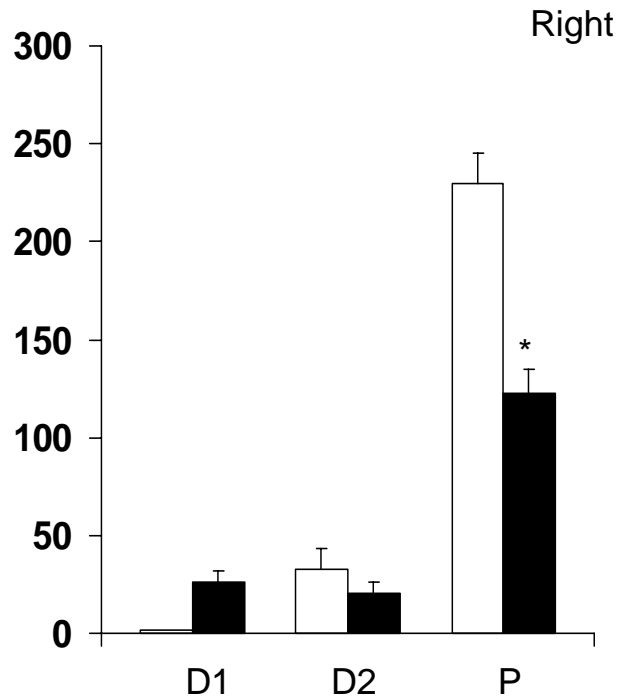

Supplement: MOESM5 [file 9567562]
